# Supplementary material
Source: bioRxiv or medRxiv preprint supplement (https://medrxiv.org/content/medrxiv/early/2024/05/26/2024.05.24.24307838/DC1/embed/media-1.pdf)
Supplement: Supplementary file [file media-1.pdf]

# Supplementary material: A practical approach for estimation of patient-specific intra-aneurysmal flows using variational data assimilation

Tsubasa Ichimura<sup>1</sup>, Shigeki Yamada<sup>2</sup>, Yoshiyuki Watanabe<sup>3</sup>, Hiroto Kawano<sup>4</sup>, and Satoshi Ii<sup>5,1</sup>

<sup>1</sup>Graduate School of Systems Design, Tokyo Metropolitan University, Hachioji, Tokyo, Japan

<sup>2</sup>Graduate School of Medicine, Nagoya City University, Nagoya, Aichi, Japan

<sup>3</sup>Department of Radiology, Shiga University of Medical Science, Otsu, Shiga, Japan

<sup>4</sup>Faculty of Medicine, Shiga University of Medical Sciences, Otsu, Shiga, Japan

<sup>5</sup>School of Engineering, Tokyo Institute of Technology, Meguro-ku, Tokyo, Japan

April 8, 2024

## Derivation of optimality conditions in optimization problem

The Lagrangian given is rewritten to

$$L = L_1 + L_2 + L_3 + L_4 + L_5 + L_6 + L_7, \quad (1)$$

where

$$L_1 = \frac{1}{2} \int_0^T \int_{\tilde{\Omega}} (\mathbf{Q}\mathbf{u} - \mathbf{U}_{\text{obs}})^2 d\tilde{\mathbf{x}}d\tilde{t} = \frac{1}{2} \int_0^T \int_{\tilde{\Omega}} (\Delta\mathbf{u}(\tilde{\mathbf{x}}, \tilde{t}))^2 d\tilde{\mathbf{x}}d\tilde{t}, \quad (2)$$

$$L_2 = \frac{\varepsilon}{2} \int_0^T \int_{\Gamma_{\text{bd}}} \mathbf{g}^2 d\mathbf{x}dt, \quad (3)$$

$$L_3 = \int_0^T \int_{\Omega} \boldsymbol{\lambda} \cdot \left( \rho \frac{\partial \mathbf{u}}{\partial t} + \rho \mathbf{u} \cdot \nabla \mathbf{u} + \nabla p - \nabla \cdot \boldsymbol{\tau} \right) d\mathbf{x}dt, \quad (4)$$

$$L_4 = \int_0^T \int_{\Omega} \boldsymbol{\gamma} : (\boldsymbol{\tau} - \eta \nabla \mathbf{u}) d\mathbf{x}dt, \quad (5)$$

$$L_5 = - \int_0^T \int_{\Omega} \alpha \nabla \cdot \mathbf{u} d\mathbf{x}dt, \quad (6)$$

$$L_6 = \int_0^T \int_{\Gamma_{\text{wall}}} \boldsymbol{\varphi} \cdot \mathbf{u} d\mathbf{x}dt, \quad (7)$$

$$L_7 = \int_0^T \int_{\Gamma_{\text{bd}}} \boldsymbol{\xi} \cdot (\mathbf{u} - \mathbf{g}) d\mathbf{x}dt, \quad (8)$$

Note that the relation  $\boldsymbol{\tau} = \eta \nabla \mathbf{u}$  with the additional Lagrange multiplier  $\boldsymbol{\gamma}$  is added to the original form of Lagrangian in the main text.

A variation of the Lagrangian,  $\delta L$ , consists of

$$\begin{aligned}
\delta L_1 &= \int_0^T \int_{\tilde{\Omega}} \delta \mathbf{u}(\tilde{\mathbf{x}}, \tilde{t}) \cdot \Delta \mathbf{u}(\tilde{\mathbf{x}}, \tilde{t}) d\tilde{\mathbf{x}} d\tilde{t} \\
&= \int_0^T \int_{\tilde{\Omega}} Q \delta \mathbf{u}(\mathbf{x}, t) \cdot \Delta \mathbf{u}(\tilde{\mathbf{x}}, \tilde{t}) d\tilde{\mathbf{x}} d\tilde{t} \\
&= \int_0^T \int_{\tilde{\Omega}} \int_0^T \int_{\Omega} D(\mathbf{x} - \tilde{\mathbf{x}}) \delta(t - \tilde{t}) \delta \mathbf{u}(\mathbf{x}, t) d\mathbf{x} dt \cdot \Delta \mathbf{u}(\tilde{\mathbf{x}}, \tilde{t}) d\tilde{\mathbf{x}} d\tilde{t} \\
&= \int_0^T \int_{\Omega} \delta \mathbf{u}(\mathbf{x}, t) \cdot \int_0^T \int_{\tilde{\Omega}} D(\mathbf{x} - \tilde{\mathbf{x}}) \delta(t - \tilde{t}) \Delta \mathbf{u}(\tilde{\mathbf{x}}, \tilde{t}) d\tilde{\mathbf{x}} d\tilde{t} d\mathbf{x} dt \\
&= \int_0^T \int_{\Omega} \delta \mathbf{u} \cdot Q^* (Q \mathbf{u} - \mathbf{U}_{\text{obs}}) d\mathbf{x} dt,
\end{aligned} \tag{9}$$

where linear assumption is considered for  $Q^*$  and  $Q$ .

$$\delta L_2 = \varepsilon \int_0^T \int_{\Gamma_{\text{bd}}} \delta \mathbf{g} \cdot \mathbf{g} d\mathbf{x} dt, \tag{10}$$

$$\begin{aligned}
\delta L_3 &= \int_0^T \int_{\Omega} \delta \boldsymbol{\lambda} \cdot \left( \rho \frac{\partial \mathbf{u}}{\partial t} + \rho \mathbf{u} \cdot \nabla \mathbf{u} + \nabla p - \nabla \cdot \boldsymbol{\tau} \right) d\mathbf{x} dt \\
&\quad + \int_0^T \int_{\Omega} \boldsymbol{\lambda} \cdot \left( \rho \frac{\partial \delta \mathbf{u}}{\partial t} + \rho \delta \mathbf{u} \cdot \nabla \mathbf{u} + \rho \mathbf{u} \cdot \nabla \delta \mathbf{u} + \nabla \delta p - \nabla \cdot \delta \boldsymbol{\tau} \right) d\mathbf{x} dt \\
&= \int_0^T \int_{\Omega} \delta \boldsymbol{\lambda} \cdot \left( \rho \frac{\partial \mathbf{u}}{\partial t} + \rho \mathbf{u} \cdot \nabla \mathbf{u} + \nabla p - \nabla \cdot \boldsymbol{\tau} \right) d\mathbf{x} dt \\
&\quad + \int_0^T \int_{\Omega} \rho \left( \frac{\partial \boldsymbol{\lambda} \cdot \delta \mathbf{u}}{\partial t} - \frac{\partial \boldsymbol{\lambda}}{\partial t} \cdot \delta \mathbf{u} + \delta \mathbf{u} \cdot \nabla \mathbf{u} \cdot \boldsymbol{\lambda} + \nabla \cdot (\mathbf{u} \boldsymbol{\lambda} \cdot \delta \mathbf{u}) - \nabla \cdot (\mathbf{u} \boldsymbol{\lambda}) \cdot \delta \mathbf{u} \right) d\mathbf{x} dt \\
&\quad + \int_0^T \int_{\Omega} (\nabla \cdot (\boldsymbol{\lambda} \delta p) - \nabla \cdot \boldsymbol{\lambda} \delta p - \nabla \cdot (\delta \boldsymbol{\tau} \cdot \boldsymbol{\lambda}) - \nabla \boldsymbol{\lambda} : \delta \boldsymbol{\tau}) d\mathbf{x} dt \\
&= \int_0^T \int_{\Omega} \delta \boldsymbol{\lambda} \cdot \left( \rho \frac{\partial \mathbf{u}}{\partial t} + \rho \mathbf{u} \cdot \nabla \mathbf{u} + \nabla p - \nabla \cdot \boldsymbol{\tau} \right) d\mathbf{x} dt \\
&\quad + \int_0^T \int_{\Omega} \delta \mathbf{u} \cdot \rho \left( -\frac{\partial \boldsymbol{\lambda}}{\partial t} + \nabla \mathbf{u} \cdot \boldsymbol{\lambda} - \nabla \cdot (\mathbf{u} \boldsymbol{\lambda}) \right) d\mathbf{x} dt \\
&\quad + \int_0^T \int_{\Omega} (-\nabla \cdot \boldsymbol{\lambda} \delta p + \nabla \boldsymbol{\lambda} : \delta \boldsymbol{\tau}) d\mathbf{x} dt \\
&\quad + \int_0^T \int_{\Omega} \frac{\partial \boldsymbol{\lambda} \cdot \delta \mathbf{u}}{\partial t} d\mathbf{x} dt \\
&\quad + \int_0^T \int_{\Omega} \nabla \cdot (\rho \mathbf{u} \boldsymbol{\lambda} \cdot \delta \mathbf{u} + \boldsymbol{\lambda} \delta p - \delta \boldsymbol{\tau} \cdot \boldsymbol{\lambda}) d\mathbf{x} dt \\
&= \int_0^T \int_{\Omega} \delta \boldsymbol{\lambda} \cdot \left( \rho \frac{\partial \mathbf{u}}{\partial t} + \rho \mathbf{u} \cdot \nabla \mathbf{u} + \nabla p - \nabla \cdot \boldsymbol{\tau} \right) d\mathbf{x} dt \\
&\quad + \int_0^T \int_{\Omega} \delta \mathbf{u} \cdot \rho \left( -\frac{\partial \boldsymbol{\lambda}}{\partial t} + \nabla \mathbf{u} \cdot \boldsymbol{\lambda} - \nabla \cdot (\mathbf{u} \boldsymbol{\lambda}) \right) d\mathbf{x} dt \\
&\quad + \int_0^T \int_{\Omega} (-\nabla \cdot \boldsymbol{\lambda} \delta p + \nabla \boldsymbol{\lambda} : \delta \boldsymbol{\tau}) d\mathbf{x} dt \\
&\quad + \int_{\Omega} \underbrace{((\boldsymbol{\lambda} \cdot \delta \mathbf{u})|_{t=T} - (\boldsymbol{\lambda} \cdot \delta \mathbf{u})|_{t=0})}_{=0} d\mathbf{x} \\
&\quad + \int_0^T \int_{\Gamma_{\text{wall}} \cup \Gamma_{\text{bd}}} \mathbf{n} \cdot (\rho \mathbf{u} \boldsymbol{\lambda} \cdot \delta \mathbf{u} + \boldsymbol{\lambda} \delta p - \delta \boldsymbol{\tau} \cdot \boldsymbol{\lambda}) d\mathbf{x} dt
\end{aligned} \tag{11}$$

where Gauss divergence theorem is used for the last term ( $\mathbf{n}$  is the unit outward normal vector on  $\Gamma_{\text{wall}}$  and

$\Gamma_{bc}$ ), and the temporal periodicity is imposed, i.e.,  $(\boldsymbol{\lambda} \cdot \delta \mathbf{u})|_{t=T} = (\boldsymbol{\lambda} \cdot \delta \mathbf{u})|_{t=0}$ .

$$\begin{aligned} \delta L_4 &= \int_0^T \int_{\Omega} (\delta \boldsymbol{\gamma} : (\boldsymbol{\tau} - \eta \nabla \mathbf{u}) + \boldsymbol{\gamma} : \delta \boldsymbol{\tau} - \eta \nabla \cdot (\boldsymbol{\gamma} \cdot \delta \mathbf{u}) + \eta (\nabla \cdot \boldsymbol{\gamma}) \cdot \delta \mathbf{u}) d\mathbf{x} dt \\ &= \int_0^T \int_{\Omega} (\delta \boldsymbol{\gamma} : (\boldsymbol{\tau} - \eta \nabla \mathbf{u}) + \boldsymbol{\gamma} : \delta \boldsymbol{\tau} + \eta (\nabla \cdot \boldsymbol{\gamma}) \cdot \delta \mathbf{u}) d\mathbf{x} dt \\ &\quad - \int_0^T \int_{\Gamma_{\text{wall}} \cup \Gamma_{\text{bd}}} \boldsymbol{\eta} \mathbf{n} \cdot \boldsymbol{\gamma} \cdot \delta \mathbf{u} d\mathbf{x} dt, \end{aligned} \quad (12)$$

$$\begin{aligned} \delta L_5 &= - \int_0^T \int_{\Omega} (\delta \alpha \nabla \cdot \mathbf{u} + \nabla \cdot (\alpha \delta \mathbf{u}) - \nabla \alpha \cdot \delta \mathbf{u}) d\mathbf{x} dt \\ &= \int_0^T \int_{\Omega} (-\delta \alpha \nabla \cdot \mathbf{u} + \nabla \alpha \cdot \delta \mathbf{u}) d\mathbf{x} dt \\ &\quad - \int_0^T \int_{\Gamma_{\text{wall}} \cup \Gamma_{\text{bd}}} \alpha \mathbf{n} \cdot \delta \mathbf{u} d\mathbf{x} dt, \end{aligned} \quad (13)$$

$$\delta L_6 = \int_0^T \int_{\Gamma_{\text{wall}}} (\delta \boldsymbol{\varphi} \cdot \mathbf{u} + \boldsymbol{\varphi} \cdot \delta \mathbf{u}) d\mathbf{x} dt, \quad (14)$$

$$\delta L_7 = \int_0^T \int_{\Gamma_{\text{bd}}} (\delta \boldsymbol{\xi} \cdot (\mathbf{u} - \mathbf{g}) + \boldsymbol{\xi} \cdot (\delta \mathbf{u} - \delta \mathbf{g})) d\mathbf{x} dt, \quad (15)$$

Thus,  $\delta L = \sum_{i=1}^7 \delta L_i$  can be also written to

$$\begin{aligned} \delta L &= \int_0^T \int_{\Omega} (\delta L_{\mathbf{u}}^{\Omega} \cdot \delta \mathbf{u} + \delta L_p^{\Omega} \delta p + \delta L_{\boldsymbol{\tau}}^{\Omega} : \delta \boldsymbol{\tau} + \delta L_{\boldsymbol{\lambda}}^{\Omega} \cdot \delta \boldsymbol{\lambda} + \delta L_{\alpha}^{\Omega} \delta \alpha + \delta L_{\boldsymbol{\gamma}}^{\Omega} : \delta \boldsymbol{\gamma}) d\mathbf{x} dt \\ &\quad + \int_0^T \int_{\Gamma_{\text{wall}}} (\delta L_{\mathbf{u}}^{\Gamma_{\text{wall}}} \cdot \delta \mathbf{u} + \delta L_p^{\Gamma_{\text{wall}}} \delta p + \delta L_{\boldsymbol{\tau}}^{\Gamma_{\text{wall}}} : \delta \boldsymbol{\tau} + \delta L_{\boldsymbol{\varphi}}^{\Gamma_{\text{wall}}} \cdot \delta \boldsymbol{\varphi}) d\mathbf{x} dt \\ &\quad + \int_0^T \int_{\Gamma_{\text{bd}}} (\delta L_{\mathbf{u}}^{\Gamma_{\text{bd}}} \cdot \delta \mathbf{u} + \delta L_p^{\Gamma_{\text{bd}}} \delta p + \delta L_{\boldsymbol{\tau}}^{\Gamma_{\text{bd}}} : \delta \boldsymbol{\tau} + \delta L_{\boldsymbol{\xi}}^{\Gamma_{\text{bd}}} \cdot \delta \boldsymbol{\xi} + \delta L_{\mathbf{g}}^{\Gamma_{\text{bd}}} \cdot \delta \mathbf{g}) d\mathbf{x} dt, \end{aligned} \quad (16)$$

where

$$\delta L_{\mathbf{u}}^{\Omega} = Q^*(Q\mathbf{u} - \mathbf{U}_{\text{obs}}) + \rho \left( -\frac{\partial \boldsymbol{\lambda}}{\partial t} + \nabla \mathbf{u} \cdot \boldsymbol{\lambda} - \nabla \cdot (\mathbf{u} \boldsymbol{\lambda}) \right) + \eta \nabla \cdot \boldsymbol{\gamma} + \nabla \alpha, \quad (17)$$

$$\delta L_p^{\Omega} = -\nabla \cdot \boldsymbol{\lambda}, \quad (18)$$

$$\delta L_{\boldsymbol{\tau}}^{\Omega} = \nabla \boldsymbol{\lambda} + \boldsymbol{\gamma}, \quad (19)$$

$$\delta L_{\boldsymbol{\lambda}}^{\Omega} = \rho \left( \frac{\partial \mathbf{u}}{\partial t} + \mathbf{u} \cdot \nabla \mathbf{u} \right) + \nabla p - \nabla \cdot \boldsymbol{\tau}, \quad (20)$$

$$\delta L_{\alpha}^{\Omega} = -\nabla \cdot \mathbf{u}, \quad (21)$$

$$\delta L_{\boldsymbol{\gamma}}^{\Omega} = \boldsymbol{\tau} - \eta \nabla \mathbf{u}, \quad (22)$$

$$\delta L_{\mathbf{u}}^{\Gamma_{\text{wall}}} = \boldsymbol{\varphi} + \rho \mathbf{n} \cdot \mathbf{u} \boldsymbol{\lambda} - \alpha \mathbf{n} - \boldsymbol{\eta} \mathbf{n} \cdot \boldsymbol{\gamma}, \quad (23)$$

$$\delta L_p^{\Gamma_{\text{wall}}} = \mathbf{n} \cdot \boldsymbol{\lambda}, \quad (24)$$

$$\delta L_{\boldsymbol{\tau}}^{\Gamma_{\text{wall}}} = -\mathbf{n} \boldsymbol{\lambda}, \quad (25)$$

$$\delta L_{\boldsymbol{\varphi}}^{\Gamma_{\text{wall}}} = \mathbf{u}, \quad (26)$$

$$\delta L_{\mathbf{u}}^{\Gamma_{\text{bd}}} = \boldsymbol{\xi} + \rho \mathbf{n} \cdot \mathbf{u} \boldsymbol{\lambda} - \alpha \mathbf{n} - \boldsymbol{\eta} \mathbf{n} \cdot \boldsymbol{\gamma}, \quad (27)$$

$$\delta L_p^{\Gamma_{\text{bd}}} = \mathbf{n} \cdot \boldsymbol{\lambda}, \quad (28)$$

$$\delta L_{\boldsymbol{\tau}}^{\Gamma_{\text{bd}}} = -\mathbf{n} \boldsymbol{\lambda}, \quad (29)$$

$$\delta L_{\boldsymbol{\xi}}^{\Gamma_{\text{bd}}} = \mathbf{u} - \mathbf{g}, \quad (30)$$

$$\delta L_{\mathbf{g}}^{\Gamma_{\text{bd}}} = \varepsilon \mathbf{g} - \boldsymbol{\xi}. \quad (31)$$

Hence, a trivial solution for  $\delta L = 0$  is given as

$$\delta L_{\mathbf{u}}^{\Omega} = \delta L_p^{\Omega} = \delta L_{\tau}^{\Omega} = \delta L_{\lambda}^{\Omega} = \delta L_{\alpha}^{\Omega} = \delta L_{\gamma}^{\Omega} = 0, \quad \text{for } \mathbf{x} \in \Omega, t \in [0, T] \quad (32)$$

$$\delta L_{\mathbf{u}}^{\Gamma_{\text{wall}}} = \delta L_p^{\Gamma_{\text{wall}}} = \delta L_{\tau}^{\Gamma_{\text{wall}}} = \delta L_{\varphi}^{\Gamma_{\text{wall}}} = 0, \quad \text{for } \mathbf{x} \in \Gamma_{\text{wall}}, t \in [0, T] \quad (33)$$

$$\delta L_{\mathbf{u}}^{\Gamma_{\text{bd}}} = \delta L_p^{\Gamma_{\text{bd}}} = \delta L_{\tau}^{\Gamma_{\text{bd}}} = \delta L_{\xi}^{\Gamma_{\text{bd}}} = \delta L_{\mathbf{g}}^{\Gamma_{\text{bd}}} = 0, \quad \text{for } \mathbf{x} \in \Gamma_{\text{bd}}, t \in [0, T], \quad (34)$$

and these equations result in the optimality conditions.

In this study, the original and adjoint systems were derived by imposing Eqs. (32)-(34) except for  $\delta L_{\mathbf{g}}^{\Gamma_{\text{bd}}}$ , and  $\mathbf{g}$  was successively obtained following the gradient:  $\partial L / \partial \mathbf{g} = \partial J / \partial \mathbf{g} = \delta L_{\mathbf{g}}^{\Gamma_{\text{bd}}} = \varepsilon \mathbf{g} - \alpha \mathbf{n} + \eta \mathbf{n} \cdot \nabla \lambda$ .
